# Supplementary material
Source: HighWire-hosted journal article supplement (https://jnm.snmjournals.org/highwire/filestream/94538/field_highwire_adjunct_files/0/124172_Supplemental_Data.pdf)
Supplement: 124172_Supplemental_Data.pdf [file 124172_Supplemental_Data.pdf]

## Supplemental Data

### 1. ROC Analysis with $\Delta$ SUV Values

**Supplemental Table 1. Results of ROC analysis with  $\Delta$  SUV values between pre and interim FLT-PET scans**

|               | Progression-free survival |                      | Overall survival    |                      |
|---------------|---------------------------|----------------------|---------------------|----------------------|
|               | $\Delta$ SUVmax (%)       | $\Delta$ SUVmean (%) | $\Delta$ SUVmax (%) | $\Delta$ SUVmean (%) |
| AUC           | 0.774                     | 0.745                | 0.742               | 0.701                |
| p-value       | 0.001                     | 0.003                | 0.006               | 0.023                |
| Cut-off value | 65.3%                     | 72.2%                | 50.6%               | 73.1%                |
| Sensitivity   | 82.4%                     | 82.4%                | 64.3%               | 78.6%                |
| Specificity   | 70.5%                     | 70.5%                | 78.7%               | 61.7%                |
| PPV           | 51.9%                     | 51.9%                | 47.4%               | 37.9%                |
| NPV           | 91.2%                     | 91.2%                | 88.1%               | 90.6%                |

**Supplemental Table 2. Results of ROC analysis with  $\Delta$  SUV values between pre and final FLT-PET scans**

|               | Progression-free survival |                      | Overall survival    |                      |
|---------------|---------------------------|----------------------|---------------------|----------------------|
|               | $\Delta$ SUVmax (%)       | $\Delta$ SUVmean (%) | $\Delta$ SUVmax (%) | $\Delta$ SUVmean (%) |
| AUC           | 0.672                     | 0.666                | 0.609               | 0.598                |
| p-value       | 0.038                     | 0.090                | 0.220               | 0.269                |
| Cut-off value | 52.4%                     | 34.0%                | 35.4%               | 64.9%                |
| Sensitivity   | 52.9%                     | 35.3%                | 35.7%               | 50.0%                |
| Specificity   | 84.1%                     | 93.2%                | 93.6%               | 70.2%                |
| PPV           | 56.3%                     | 66.7%                | 62.5%               | 33.3%                |
| NPV           | 82.2%                     | 78.9%                | 83.0%               | 82.5%                |

## 2. Subgroup Analysis Data

### Subgroup Analysis in Patients with DLBL (*n*=50)

ROC curve analysis of SUVmax for prediction of disease progression and death showed the highest area under the curve (AUC) in interim FLT-PET (AUC 0.814 for PFS and AUC 0.841 for OS with a cut-off of 1.87;  $p < 0.001$ ) compared with pre and final FLT-PET scans. SUVmean in interim FLT-PET also showed better prediction (AUC 0.802 for PFS and AUC 0.825 for OS with a cut-off value of 1.67;  $p < 0.001$ ) compared with pre and final FLT-PET scans. Patients with interim FLT-PET SUVmax more than 1.87, who were defined as the interim PET-positive group, were associated with worse 5-year PFS and OS rates than the interim PET-negative group (for PFS: 56.4% vs. 90.1%, respectively;  $p = 0.004$ ; for OS: 57.9% vs. 90.3%, respectively;  $p = 0.004$ ) (Supplemental Fig. 1). By multivariable analysis, the prognostic value of interim FLT-PET positivity by SUVmax remained significant after adjustment with other prognostic factors (for PFS: HR 14.75, 95% CI 2.53-86.07,  $p = 0.003$ ; for OS: HR 10.76, 95% CI 2.31-50.03,  $p = 0.003$ ).

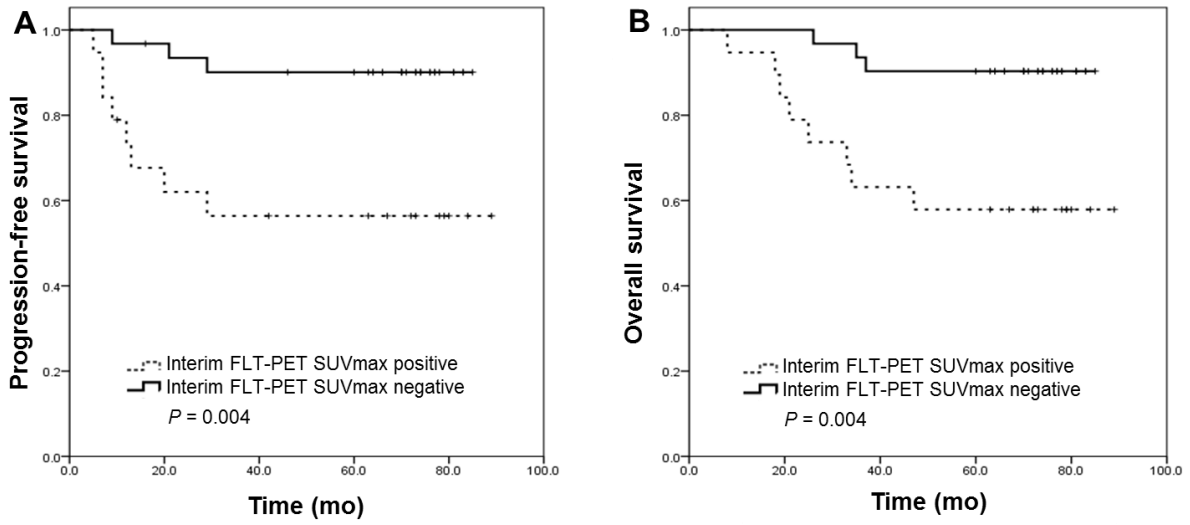

**Supplemental Figure 1.** Kaplan-Meier estimates of progression-free survival (A) and overall survival (B) according to interim FLT-PET response analysis using an SUV max cut-off value. There were significant differences in PFS and OS between FLT-PET SUVmax negative versus positive patients.
